# Supplementary material for: Identification and mapping of central pair proteins : by proteomic analysis
Source: PubMed Central journal article supplement — Biophys Physicobiol. 2020 Jun 16;17:71–85. doi: 10.2142/biophysico.BSJ-2019048 (PMC7596323; doi:10.2142/biophysico.bsj-2019048), 2020-06-16
Supplement: BSJ-2019048_SF2.pdf [file BSJ-2019048_SF2.pdf]

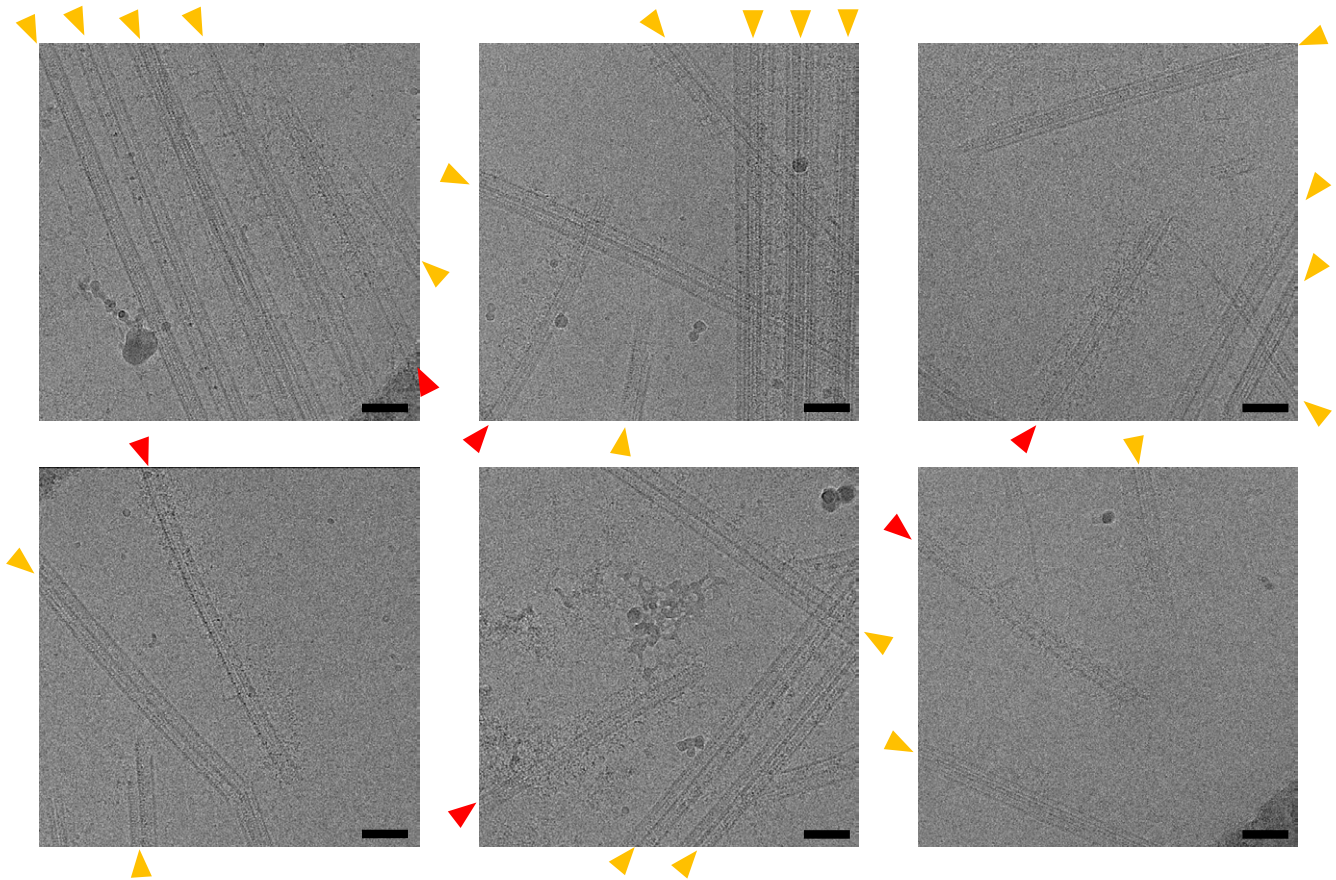

**Supplementary Figure S2** Additional cryo-EM images showing singlets from the CP. In our purified microtubule fractions, we occasionally observed singlet microtubules from the CP (red arrowheads) with characteristic appendages along with the DMTs (orange arrowheads). Scale bars, 100 nm.
