# Supplementary material for: Identification and mapping of central pair proteins : by proteomic analysis
Source: PubMed Central journal article supplement — Biophys Physicobiol. 2020 Jun 16;17:71–85. doi: 10.2142/biophysico.BSJ-2019048 (PMC7596323; doi:10.2142/biophysico.bsj-2019048), 2020-06-16
Supplement: BSJ-2019048_SF3.pdf [file BSJ-2019048_SF3.pdf]

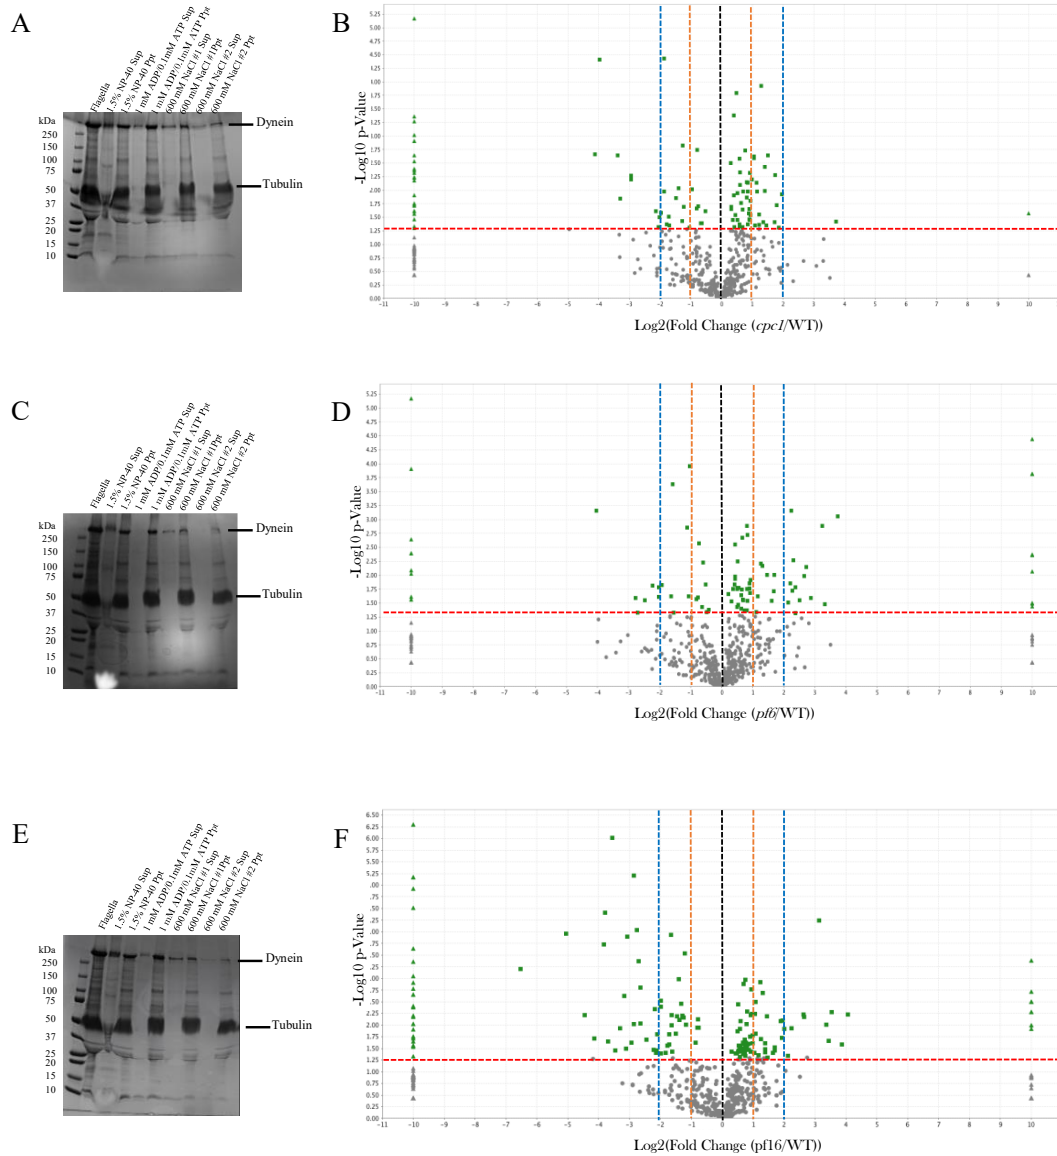

**Supplementary Figure S3** Purification of microtubule fractions from *cpc1*, *pf6* and *pfl6* strains, and comparison of MS results with WT.

(A and B) SDS-PAGE results of sequential purifications of microtubule fractions from *cpc1* flagella and a volcano plot comparing *cpc1* result with WT result. (C and D) SDS-PAGE gel of purification from *pf6* axoneme and a volcano plot of *pf6* MS result compared with WT result. (E and F) *pfl6* strain SDS-PAGE result and its MS result on a volcano plot compared with WT. Dashed red line indicates the significance threshold ( $p < 0.05$ ) and proteins showed significant change are shown in green. Triangle dots represent completely missing proteins in either mutant results or WT result. Orange and blue dashed lines indicate two- and four-fold changes, respectively.
