# Supplementary material for: Identification and mapping of central pair proteins : by proteomic analysis
Source: PubMed Central journal article supplement — Biophys Physicobiol. 2020 Jun 16;17:71–85. doi: 10.2142/biophysico.BSJ-2019048 (PMC7596323; doi:10.2142/biophysico.bsj-2019048), 2020-06-16
Supplement: BSJ-2019048_SF4.pdf [file BSJ-2019048_SF4.pdf]

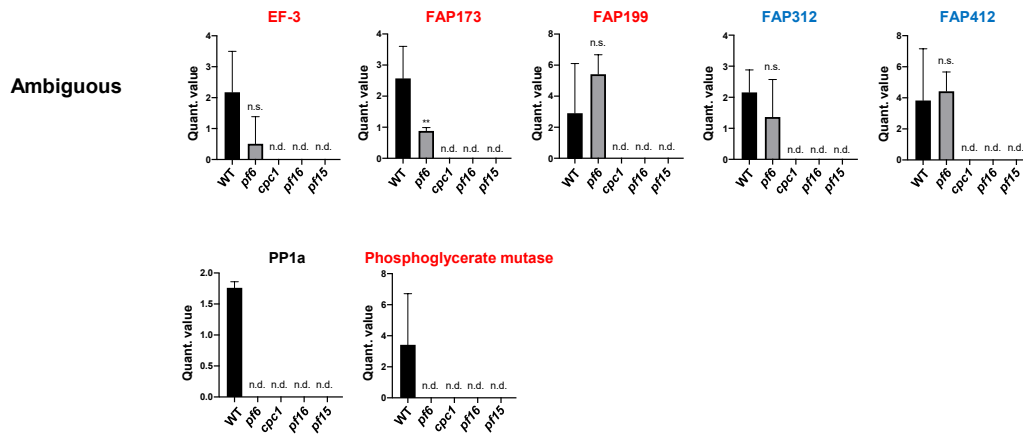

**Supplementary Figure S4** Additional MS profiles for other CP protein candidates. MS profiles of CP candidates which were not readily assigned to certain CP sub-structures are summarized here.
