# Supplementary material for: Identification and mapping of central pair proteins : by proteomic analysis
Source: PubMed Central journal article supplement — Biophys Physicobiol. 2020 Jun 16;17:71–85. doi: 10.2142/biophysico.BSJ-2019048 (PMC7596323; doi:10.2142/biophysico.bsj-2019048), 2020-06-16
Supplement: BSJ-2019048_ST3.pdf [file BSJ-2019048_ST3.pdf]

**Supplementary Table S3 List of proteins only identified in Zhao *et al.*, (2019) [4]**

| Names  | Uniprot ID | WT<br>exclusive unique peptide<br>count (quantitative value) | <i>pf15</i><br>exclusive unique peptide<br>count (quantitative value) | Comments                                      |
|--------|------------|--------------------------------------------------------------|-----------------------------------------------------------------------|-----------------------------------------------|
| FAP39  | A8J0V2     | 6, 10, 4 (8, 9, 7)                                           | 4, 5, 4 (8, 10, 4)                                                    | Not significantly<br>decreased in <i>pf15</i> |
| FAP49  | A8J4C7     | 11, 0, 0 (10, 0, 0)                                          | 9, 8, 9 (11, 9, 9)                                                    | Not confident <sup>b</sup>                    |
| FAP72  | A8J4C5     | 10, 3, 0 (9, 2, 0)                                           | 9, 8, 9 (11, 9, 9)                                                    | Not confident <sup>b</sup>                    |
| FAP139 | A8J134     | 11, 16, 2 (12, 15, 5)                                        | 8, 9, 8 (10, 16, 8)                                                   | Not significantly<br>decreased in <i>pf15</i> |
| FAP154 | A8J4C9     | 18, 4, 4 (17, 2, 7)                                          | 16, 14, 19 (19, 16, 20)                                               | Not confident <sup>b</sup>                    |
| FAP178 | A8ID60     | 0, 2, 0 (0, 2, 0)                                            | 0, 0, 0 (0, 0, 0)                                                     | Not significantly<br>decreased in <i>pf15</i> |
| FAP275 | A8J870     | 0, 1, 0 (0, 1, 0)                                            | 0, 0, 0 (0, 0, 0)                                                     | Not significantly<br>decreased in <i>pf15</i> |
| FAP286 | A8IKJ2     | 0, 0, 0 (0, 0, 0)                                            | 0, 0, 0 (0, 0, 0)                                                     | Not detected                                  |
| FAP345 | A8JED5     | 1, 1, 2 (1, 1, 3)                                            | 0, 0, 0 (0, 0, 0)                                                     | Not significantly<br>decreased in <i>pf15</i> |
| FAP380 | A8HP72     | 2, 1, 0 (2, 1, 0)                                            | 1, 0, 0 (1, 0, 0)                                                     | Not significantly<br>decreased in <i>pf15</i> |
| FAP411 | A8J4L4     | 0, 0, 0 (0, 0, 0)                                            | 0, 0, 0 (0, 0, 0)                                                     | Not detected                                  |
| FAP413 | A8J3X1     | 0, 0, 2 (0, 0, 5)                                            | 0, 0, 0 (0, 0, 0)                                                     | Not significantly<br>decreased in <i>pf15</i> |
| FAP414 | A8J0A0     | 0, 2, 0 (0, 1, 0)                                            | 1, 0, 0 (1, 0, 0)                                                     | Not significantly<br>decreased in <i>pf15</i> |
| FAP415 | A8I0B9     | 0, 0, 0 (0, 0, 0)                                            | 0, 0, 0 (0, 0, 0)                                                     | Not detected                                  |
| FAP416 | A8IQU8     | 0, 0, 0 (0, 0, 0)                                            | 0, 0, 0 (0, 0, 0)                                                     | Not detected                                  |
| FAP417 | A8IBK1     | 1, 0, 0 (1, 0, 0)                                            | 0, 1, 0 (0, 1, 0)                                                     | Not significantly<br>decreased in <i>pf15</i> |
| DIP13  | Q9XF62     | 0, 0, 0 (0, 0, 0)                                            | 0, 0, 0 (0, 0, 0)                                                     | Not detected                                  |
| NAP    | O24426     | 0, 0, 0 (0, 0, 0)                                            | 0, 0, 0 (0, 0, 0)                                                     | Not detected                                  |

<sup>a</sup> Three values from biological triplicate for both exclusive unique peptide counts and quantitative values are shown.

<sup>b</sup> There were peptide sequences shared between FAP49, FAP72 and FAP154 and the detected peptides were not confidently assigned to each protein. Therefore, total spectrum counts are shown for these proteins instead of exclusive unique peptide counts.

[4] Zhao, L., Hou, Y., Picariello, T., Craige, B. & Witman, G.B. Proteome of the central apparatus of a ciliary axoneme. *J. Cell Biol.* **218**, 2051-2070 (2019).
